# Supplementary material for: Increases in Alcohol Intakes Are Concurrent with Higher Energy Intakes: Trends in Alcohol Consumption in Australian National Surveys from 1983, 1995 and 2012
Source: MDPI journal article supplement (doi:10.3390/nu9090944), 2017-08-28
Supplement: s1 [file s1]

**Supplementary Table S1:** Per-consumer median (IQR) energy (%) and alcohol (g) from alcoholic beverages for Australian adults from the National Dietary Survey of Adults - 1983 (n=5283), the National Nutrition Survey - 1995 (n=5544) and the National Nutrition and Physical Activity Survey - 2011/12 (n=4486) excluding low energy-reporters\*

| Sex   | Age   | SURVEY | (n)  | Alcohol (%E) |            | P-Value | Alcohol (g) |             | P-Value |
|-------|-------|--------|------|--------------|------------|---------|-------------|-------------|---------|
| Men   | 25-34 | 1983   | 388  | 8.4          | (4.3-16.4) | 0.0014  | 28.7        | (14.3-55.7) | 0.3     |
|       |       | 1995   | 338  | 10.1         | (5.3-18.2) |         | 30.5        | (16.0-64.4) |         |
|       |       | 2012   | 188  | 11.5         | (6.5-18.8) |         | 38.1        | (17.8-54.6) |         |
|       | 35-44 | 1983   | 413  | 11.8         | (6.5-19.6) | 0.2     | 35.5        | (21.4-63.5) | 0.8     |
|       |       | 1995   | 350  | 11.8         | (6.6-19.9) |         | 34.8        | (17.8-59.9) |         |
|       |       | 2012   | 217  | 13.1         | (6.6-23.2) |         | 40.9        | (17.7-61.4) |         |
|       | 45-54 | 1983   | 324  | 13.0         | (7.4-20.7) | <.0001  | 38.2        | (21.5-60.8) | 0.0002  |
|       |       | 1995   | 344  | 11.2         | (6.4-18.2) |         | 33.5        | (18.0-53.9) |         |
|       |       | 2012   | 249  | 15.1         | (8.5-24.2) |         | 44.3        | (22.9-79.1) |         |
|       | 55-64 | 1983   | 324  | 11.5         | (6.0-18.8) | <.0001  | 31.0        | (17.6-57.0) | <.0001  |
|       |       | 1995   | 253  | 12.5         | (6.6-19.4) |         | 32.3        | (17.6-53.7) |         |
|       |       | 2012   | 242  | 15.7         | (9.1-25.1) |         | 45.7        | (26.0-76.2) |         |
|       | 25-64 | 1983   | 1449 | 8.1          | (5.8-19.0) | <.0001  | 32.9        | (17.6-58.7) | <.0001  |
|       |       | 1995   | 1285 | 8.9          | (6.0-19.1) |         | 33.0        | (16.9-57.2) |         |
|       |       | 2012   | 896  | 12.6         | (7.4-23.1) |         | 40.9        | (21.6-68.2) |         |
| Women | 25-34 | 1983   | 243  | 8.3          | (4.3-13.2) | 0.0002  | 20.9        | (11.6-34.2) | 0.0002  |
|       |       | 1995   | 189  | 9.6          | (5.7-15.6) |         | 25.4        | (14.3-43.1) |         |
|       |       | 2012   | 119  | 10.2         | (7.5-18.7) |         | 27.9        | (14.7-47.3) |         |
|       | 35-44 | 1983   | 280  | 8.3          | (4.7-15.4) | <.0001  | 21.3        | (11.7-36.8) | <.0001  |
|       |       | 1995   | 232  | 9.4          | (5.7-17.0) |         | 23.9        | (14.0-40.7) |         |
|       |       | 2012   | 186  | 12.6         | (7.4-21.7) |         | 31.0        | (15.3-54.8) |         |
|       | 45-54 | 1983   | 201  | 8.2          | (4.5-15.2) | <.0001  | 17.5        | (8.9-35.0)  | <.0001  |
|       |       | 1995   | 218  | 8.6          | (5.0-16.6) |         | 21.6        | (11.7-40.0) |         |
|       |       | 2012   | 210  | 11.7         | (7.3-19.8) |         | 28.1        | (16.3-52.3) |         |
|       | 55-64 | 1983   | 188  | 7.4          | (4.3-13.3) | <.0001  | 15.1        | (8.8-27.8)  | <.0001  |
|       |       | 1995   | 159  | 7.8          | (4.8-14.5) |         | 17.9        | (10.7-36.0) |         |
|       |       | 2012   | 193  | 15.1         | (8.5-23.0) |         | 34.0        | (19.8-61.7) |         |
|       | 25-64 | 1983   | 912  | 8.1          | (4.4-13.9) | <.0001  | 18.1        | (9.7-34.9)  | <.0001  |
|       |       | 1995   | 798  | 8.9          | (5.3-15.9) |         | 23.4        | (12.7-41.1) |         |
|       |       | 2012   | 708  | 12.6         | (7.5-21.7) |         | 29.4        | (16.3-54.5) |         |

Alcohol (%E), percentage energy from alcohol

Low energy-reporters: Energy-intake: basal-metabolic-ratio <0.87

P-Value: Kruskal–Wallis one-way analysis of variance controlling for age, sex and survey
